# Supplementary material for: Enhancement of NH3-SCR performance of LDH-based MMnAl (M = Cu, Ni, Co) oxide catalyst: influence of dopant M
Source: Royal Society of Chemistry journal article supplement (doi:10.1039/c9ra08391j), 2019-01-01
Supplement: c9ra08391j1.pdf [file c9ra08391j1.pdf]

## Electronic Supplementary Information

### Enhancement of NH<sub>3</sub>-SCR performance of LDHs based MMnAl (M = Cu, Ni, Co) oxides catalyst: influence of doping M

Yali Du, ‡<sup>a</sup> Lili Liu, ‡<sup>b</sup> Yalin Feng, <sup>b</sup> Baoshuan Yang <sup>b</sup> and Xu Wu <sup>\*b</sup>

<sup>a</sup>College of Chemistry and Chemical Engineering, Jinzhong University, Jinzhong, 030619, PR China. E-mail: dyl0037@163.com.

<sup>b</sup>College of Chemistry and Chemical Engineering, Taiyuan University of Technology, Taiyuan 030024, PR China. E-mail: wuxu@tyut.edu.cn. Tel: +86-0351-6018528.

‡ These authors contributed equally to this work.

## Figure captions

**Table S1** The list of experimental conditions for excluding external diffusion.

**Fig. S1** NO<sub>x</sub> conversions of CoMnAl-LDO with different pellet sizes.

**Fig. S2** NO<sub>x</sub> conversions of CoMnAl-LDO under different gas flows.

In order to calculate kinetic parameters, it is necessary to use the NO<sub>x</sub> conversion data that has excluded the effect of the internal and external diffusion. Here, CoMnAl-LDO catalyst was selected as a representative sample and the specific experimental conditions are as follows:

To ensure the elimination of internal diffusion, the catalytic test with different pellet sizes (20-40, 40-60, 60-80, 80-100 mesh) over CoMnAl-LDO catalyst was performed at 210 °C under a GHSV of 30,000 h<sup>-1</sup>. The composition of the reaction gas is: 500 ppm NH<sub>3</sub>, 500 ppm NO, 5 vol.% O<sub>2</sub> and N<sub>2</sub> as balance gas.

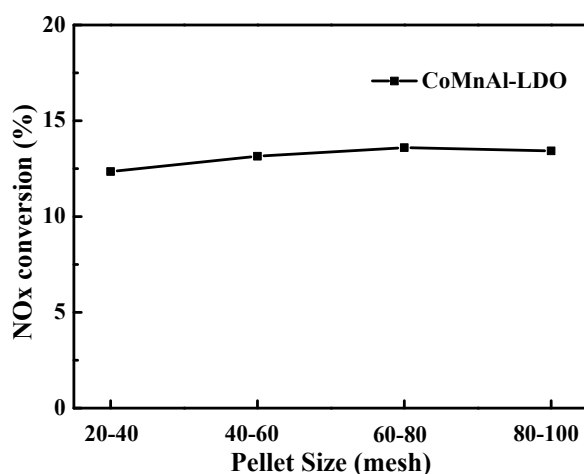

**Fig. S1** NO<sub>x</sub> conversions of CoMnAl-LDO with different pellet sizes.

Fig. S1 shows NO<sub>x</sub> conversion as a function of catalyst pellet sizes. It can be seen that the NO<sub>x</sub> conversion slightly increased with the decrease of pellet size. When the pellet size of catalyst is 60-80 mesh, the NO<sub>x</sub> conversion achieved a maximum value of ~13.5% and hardly changes as the pellet size further decreases, indicating that the effect of internal diffusion can be eliminated at this pellet size (60-80 mesh) as well as smaller sizes.

To ensure the elimination of external diffusion, the catalytic test over CoMnAl-LDO catalyst (pellet size: 60-80 mesh) with different gas flows and catalyst masses was performed at 210 °C under a GHSV of 30,000 h<sup>-1</sup>. The composition of the reaction gas

is: 500 ppm NH<sub>3</sub>, 500 ppm NO, 5 vol.% O<sub>2</sub>, N<sub>2</sub> as balance gas. A list of gas flows and catalyst masses is shown in Table S1.

**Table S1.** A list of gas flows and catalyst masses

| Catalyst mass (mg) | Gas flows (mL/min) |
|--------------------|--------------------|
| 45                 | 120                |
| 65                 | 180                |
| 85                 | 240                |
| 105                | 300                |

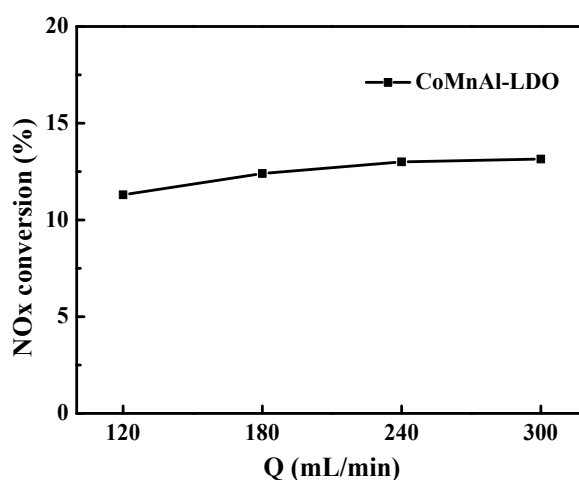

**Fig. S2** NO<sub>x</sub> conversions of CoMnAl-LDO under different gas flows

Fig. S2 shows the NO<sub>x</sub> conversion as a function of gas flows. When the gas flow rate is low, the NO<sub>x</sub> conversion increases with the increase of the flow rate. When the flow rate is 240 mL/min, the NO<sub>x</sub> conversion is basically unchanged, which indicates that the influence of the external diffusion can be eliminated at this time.

Therefore, for CoMnAl-LDO catalyst, test conditions with a gas flow rate of 240 mL/min and a catalyst pellet size of 60-80 mesh can simultaneously eliminate the effects of internal and external diffusion, thus ensuring the accurate kinetic data.
